# Supplementary material for: Sex Differences in Diabetes and Risk of Incident Coronary Artery Disease in Healthy Young and Middle-Aged Adults
Source: PubMed Central journal article supplement — Diabetes Care. 2014 Feb 11;37(3):830–8. doi: 10.2337/dc13-1755 (PMC3931379; doi:10.2337/dc13-1755), 2014-02-11
Supplement: supp_dc13-1755v131755_DC131755SupplementaryData.pdf [file supp_dc13-1755v131755_DC131755SupplementaryData.pdf]

SUPPLEMENTARY DATA

**Supplementary Table 1. Differences in Cardiovascular Risk Factors and Treatments by Gender and Diabetes Status\***

|                                | GeneSTAR   |             |            |             | MESA       |             |            |             | NHANES III Follow-Up Study |             |            |             |
|--------------------------------|------------|-------------|------------|-------------|------------|-------------|------------|-------------|----------------------------|-------------|------------|-------------|
|                                | Women      |             | Men        |             | Women      |             | Men        |             | Women                      |             | Men        |             |
|                                | Diabetes   | No Diabetes | Diabetes                   | No Diabetes | Diabetes   | No Diabetes |
| n                              | 74         | 715         | 59         | 600         | 141        | 1496        | 150        | 1285        | 257                        | 2952        | 402        | 3386        |
| Age (years)                    | 48.7 (6.4) | 46.6 (7.1)  | 48.5 (6.6) | 45.9 (7.3)  | 54.2 (4.5) | 52.5 (4.5)  | 53.9 (4.2) | 52.4 (4.5)  | 43.8 (10.8)                | 36.5 (10.9) | 47.4 (9.0) | 36.2 (10.7) |
| Race/ethnicity (%)             |            |             |            |             |            |             |            |             |                            |             |            |             |
| European American              | 27%        | 50.1%       | 42.4%      | 68.2%       | 13.5%      | 39.2%       | 22%        | 39.7%       | 61.4%                      | 73.9%       | 76.2%      | 75.1%       |
| African American               | 73%        | 49.4%       | 57.6%      | 31.5%       | 9.2%       | 11.7%       | 10.7%      | 11.9%       | 18.3%                      | 12.5%       | 13.5%      | 10.3%       |
| Hispanic American              | --         | --          | --         | --          | 45.4%      | 26.9%       | 37.3%      | 24.9%       | 9.3%                       | 5.5%        | 7.9%       | 6.4%        |
| Chinese American               | --         | --          | --         | --          | 31.9%      | 22.1%       | 30%        | 23.5%       | --                         | --          | --         | --          |
| Other                          | 0%         | 0.5%        | 0%         | 0.33%       | --         | --          | --         | --          | 10.9%                      | 8.0%        | 2.4%       | 8.2%        |
| Education level (%)            |            |             |            |             |            |             |            |             |                            |             |            |             |
| Less than HS                   | 21.6%      | 16.8%       | 15.3%      | 20.3%       | 20.6%      | 12.2%       | 19.3%      | 11.2%       | 33.6%                      | 17.9%       | 29.4%      | 19.5%       |
| High school                    | 45.9%      | 44.5%       | 42.4%      | 36.2%       | 24.8%      | 16.6%       | 16%        | 13.1%       | 38.2%                      | 38.2%       | 32.5%      | 31.9%       |
| More than HS                   | 32.4%      | 38.7%       | 42.4%      | 43.5%       | 54.6%      | 71.1%       | 64.7%      | 75.7%       | 28.2%                      | 43.9%       | 38.2%      | 48.5%       |
| BMI (kg/m <sup>2</sup> )       | 34.9 (6.8) | 29.5 (6.8)  | 33.4 (6.0) | 28.1 (4.6)  | 33.2 (6.7) | 28.9 (6.6)  | 30.3 (5.2) | 28 (4.3)    | 31.4 (7.7)                 | 25.8 (6.1)  | 30.4 (5.8) | 26.4 (4.9)  |
| Current Smoking (%)            | 35.1%      | 30.2%       | 18.6%      | 31.3%       | 14.2%      | 16.6%       | 26%        | 19.6%       | 28.1%                      | 28.1%       | 26.6%      | 34.7%       |
| Family History of CAD          | 100%       | 100%        | 100%       | 100%        | 25.4%      | 20%         | 17.9%      | 17.3%       | 11.6%                      | 8.6%        | 13.1%      | 6.4%        |
| Systolic BP (mmHg)             | 141 (16.2) | 132 (16.4)  | 140 (16.3) | 135 (14.2)  | 128 (20.4) | 117 (19.4)  | 125 (17.5) | 120 (16.3)  | 123 (18.1)                 | 113 (13.7)  | 129 (14.1) | 121 (12.3)  |
| Diastolic BP (mmHg)            | 86 (10)    | 83 (10)     | 88 (10)    | 87 (9.5)    | 71 (10)    | 69 (10)     | 76 (8.8)   | 76 (9.3)    | 75 (9.6)                   | 71 (9.4)    | 80 (9.6)   | 77 (9.9)    |
| BP medication use (%)          | 50%        | 24.3%       | 40.7%      | 18.5%       | 57.9%      | 23.4%       | 47.3%      | 19.8%       | 29.2%                      | 9.1%        | 30.8%      | 7.6%        |
| Cholesterol (mg/dl)            |            |             |            |             |            |             |            |             |                            |             |            |             |
| Total                          | 222.0 (39) | 222 (48)    | 225 (49)   | 221 (48)    | 196 (41)   | 198 (37)    | 185 (41)   | 193 (35)    | 224.8 (50)                 | 195.4 (40)  | 203.3 (50) | 199 (40)    |
| LDL**                          | 138 (35)   | 140 (44)    | 139 (39)   | 145 (43)    | 118 (36)   | 117 (32)    | 111 (38)   | 121 (31)    | 135.1 (35)                 | 118.9 (35)  | 122 (34)   | 129 (36)    |
| HDL                            | 50 (17)    | 58 (16)     | 46 (18)    | 47 (15)     | 49 (13)    | 56 (15)     | 41 (10)    | 44 (11)     | 49 (14)                    | 55 (15)     | 41 (14)    | 46 (13)     |
| Triglycerides                  | 165 (109)  | 118 (69)    | 227 (252)  | 159 (127)   | 155 (108)  | 123 (86)    | 177 (118)  | 139 (88)    | 262 (318)                  | 111 (74)    | 246 (381)  | 135 (96)    |
| Cholesterol medication use (%) | 9.4%       | 6.7%        | 15.3%      | 6%          | 23.4%      | 8.3%        | 20.7%      | 10%         | 4.7%                       | 1.9%        | 9.8%       | 1.9%        |
| Fasting glucose (mg/dl)        | 177 (69)   | 89 (12)     | 175 (69)   | 93 (11)     | 160 (62.5) | 86 (10)     | 159 (62.1) | 90 (9.7)    | 162 (74.9)                 | 90 (8.9)    | 171 (67.2) | 95 (8.7)    |

\*Unless otherwise indicated, mean ± SD are shown.

\*\* Low density lipoprotein (LDL) cholesterol was calculated if triglyceride levels were <400 mg/dL.

SUPPLEMENTARY DATA

**Supplementary Table 2.** Cox regression models demonstrating relative risk (hazard ratios and 95% confidence intervals) for incident CAD events associated with gender by diabetes status, in adults <60 years at baseline

|                           | Number of Events | Incidence Rate/1000py | Model 1*          | Model 2**         | p-value for interaction          |  |
|---------------------------|------------------|-----------------------|-------------------|-------------------|----------------------------------|--|
| <b>GeneSTAR</b>           |                  |                       |                   |                   |                                  |  |
| <u>No Diabetes</u>        |                  |                       |                   |                   |                                  |  |
| Men                       | 91               | 11.22                 | 2.78 (1.92, 4.00) | 2.33 (1.54, 3.57) | Model 1: 0.006<br>Model 2: 0.038 |  |
| Women                     | 37               | 4.27                  | Reference         | Reference         |                                  |  |
| <u>Diabetes</u>           |                  |                       |                   |                   |                                  |  |
| Men                       | 9                | 12.86                 | 0.56 (0.20, 1.54) | 0.68 (0.13, 3.57) |                                  |  |
| Women                     | 14               | 17.65                 | Reference         | Reference         |                                  |  |
| <b>MESA</b>               |                  |                       |                   |                   |                                  |  |
| <u>No Diabetes</u>        |                  |                       |                   |                   |                                  |  |
| Men                       | 52               | 5.64                  | 3.57 (2.08, 6.25) | 3.23 (1.82, 5.88) | Model 1: 0.12<br>Model 2: 0.14   |  |
| Women                     | 18               | 1.66                  | Reference         | Reference         |                                  |  |
| <u>Diabetes</u>           |                  |                       |                   |                   |                                  |  |
| Men                       | 10               | 9.71                  | 1.19 (0.44, 3.13) | 1.22 (0.38, 4.00) |                                  |  |
| Women                     | 7                | 7.34                  | Reference         | Reference         |                                  |  |
| <b>NHANES<sup>†</sup></b> |                  |                       |                   |                   |                                  |  |
| <u>No Diabetes</u>        |                  |                       |                   |                   |                                  |  |
| Men                       | 34               | 0.88                  | 2.22 (0.91, 5.56) | 1.20 (0.42, 3.45) | Model 1: 0.15<br>Model 2: 0.22   |  |
| Women                     | 11               | 0.40                  | Reference         | Reference         |                                  |  |
| <u>Diabetes</u>           |                  |                       |                   |                   |                                  |  |
| Men                       | 14               | 1.83                  | 0.93 (0.26, 3.45) | 0.76 (0.25, 2.27) |                                  |  |
| Women                     | 14               | 2.37                  | Reference         | Reference         |                                  |  |

\*Model 1: age, race, education

\*\*Model 2: Model 1 + BMI + smoking + systolic BP + HDL cholesterol + non-HDL cholesterol + blood pressure medication use + cholesterol medication use

<sup>†</sup> Only fatal CAD events ascertained.

SUPPLEMENTARY DATA

**Supplementary Figure 1.** Meta-analysis of 3 cohort studies demonstrating hazard ratios of incident CAD, adjusted for traditional cardiovascular risk factors, in men versus women by diabetes status.

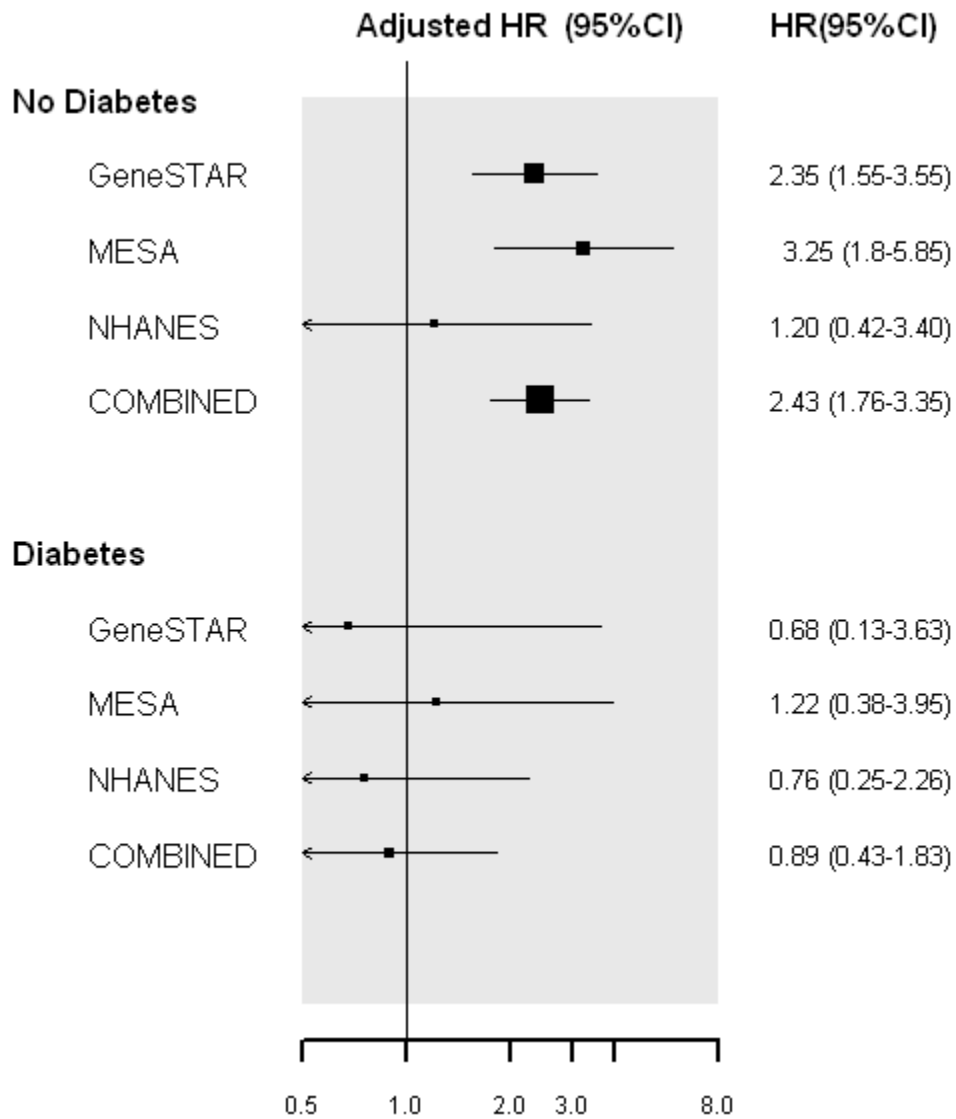

In meta-analyses, after accounting for age, race, education, body-mass index, smoking, hypertension, HDL and non-HDL cholesterol, anti-hypertensive and cholesterol-lowering medication, the fully adjusted hazard ratio for incident CAD in men versus women was significant in diabetes (HR=2.43, 1.76-3.35) and non-significant in those without diabetes (HR=0.89, 0.43-1.83). The interaction by diabetes status was significant (p=0.013).
